# Supplementary material for: Subclinical Atherosclerosis Progression in Low-Risk Middle-Aged Adults: Carotid Leads Femoral in IMT Increase but not in Plaque Formation
Source: Preprints.org preprint supplement (doi:10.20944/preprints202407.1343.v1), 2024-07-16
Supplement: Supplementary file 1 [file supplementary]

## Sheet: Table 2
Parameters	Baseline	Follow-up	∆	P
	N=187/141	N=141
	Mean (SD)	Mean (SD)	Mean (SD)
Risk age (N/ %)	41/ 21.9	65/ 46.1	24/ 24.2	NS**
Sex (male) (N/ %)	75/ 40.1	61/ 43.3	-14/ 3.2	NS**
Positive family history (N/ %)	33/ 17.8	31/ 22.1	-2/ 4.3	NS**
DLP (N/%)	132/ 71	126/ 89.4	-6/ 18.4	<0.001**
AH (N/%)	48/ 25.8	54/ 38.6	6/ 12.8	<0.001**
Duration of AH (years)	0.78 (2.12)	2.1 (4.57)	1.32/ 2.45	<0.001*
Smoking (N/ %)	38/ 20.3	28/ 19.9	-10/ -0.4	NS**
MetS (N/ %)	31/ 16.8	40/ 28.4	9/ 11.6	NS**
Central obesity (N/ %)	105/ 57.4	103/ 74.6	-2/ 17.2	<0.001**
SCORE fatal	0.57 (0.93)	1.16 (1.56)	0.59/ 0.63	<0.001*
SCORE total	1.81 (2.70)	3.71 (4.72)	1.9/ 2.02	<0.001*
Number of RFs	2.61 (1.63)	3.78 (6.06)	1.17/ 4.43	<0.027*
Treatment of DLP (N/%)	12 (6.4)	12 (8.5)	0/ 2.1	NS**
CIMT sin (mm)	0.54 (0.09)	0.62 (0.10)	0.08 (0.11)	<0.001*
CIMT dx (mm)	0.54 (0.09)	0.62 (0.10)	0.08 (0.12)	<0.001*
CIMT max (mm)	0.67 (0.11)	0.74 (0.11)	0.07 (0.12)	<0.001*
CIMT bilat >0.9 (N/ %)	2/ 1.1	3/ 2.1	1/ 1.0	NS**
asCIMT bilat (N/ %)	99/ 52.9	111/ 78.8	12/ 25.9	<0.001**
Carotid plaque (N/ %)	9/ 4.8	25/ 17.9	16/ 13.1	<0.001**
FIMT sin (mm)	0.56 (0.13)	0.64 (0.14)	0.08 (0.17)	<0.001*
FIMT dx (mm)	0.56 (0.14)	0.63 (0.15)	0.07 (0.15)	<0.001*
FIMT max (mm)	0.70 (0.15)	0.79 (0.17)	0.09 (0.18)	<0.001*
FIMT bilat >0.9 (N/ %)	7/ 5.1	16 (11.4)	9/ 6.3	NS**
FIMT bilat >1.1 (N/ %)	3/ 2.2	4 / 2.9	1/ 0.7	NS**
asFIMT bilat (N/ %)	32 / 23.2	63/ 44.7	31/ 21.5	<0.001**
Femoral plaque (N/ %)	5/ 3.6	25/ 17.7	20/ 14.1	<0.001**

## Sheet: Table 2 desc.
Table 2. Comparison of prevalence and mean values of cardiovascular risk factors and morphological markers of subclinical carotid/femoral atherosclerosis at baseline and after follow-up assessed with McNemar´s or paired t-test.
Parameters	Baseline	Follow-up	∆	P
	N=187/141	N=141
	Mean (SD)	Mean (SD)	Mean (SD)
Risk age (N/ %)	41/ 21.9	65/ 46.1	24/ 24.2	NS**
Sex (male) (N/ %)	75/ 40.1	61/ 43.3	-14/ 3.2	NS**
Positive family history (N/ %)	33/ 17.8	31/ 22.1	-2/ 4.3	NS**
DLP (N/%)	132/ 71	126/ 89.4	-6/ 18.4	<0.001**
AH (N/%)	48/ 25.8	54/ 38.6	6/ 12.8	<0.001**
Duration of AH (years)	0.78 (2.12)	2.1 (4.57)	1.32/ 2.45	<0.001*
Smoking (N/ %)	38/ 20.3	28/ 19.9	-10/ -0.4	NS**
MetS (N/ %)	31/ 16.8	40/ 28.4	9/ 11.6	NS**
Central obesity (N/ %)	105/ 57.4	103/ 74.6	-2/ 17.2	<0.001**
SCORE fatal	0.57 (0.93)	1.16 (1.56)	0.59/ 0.63	<0.001*
SCORE total	1.81 (2.70)	3.71 (4.72)	1.9/ 2.02	<0.001*
Number of RFs	2.61 (1.63)	3.78 (6.06)	1.17/ 4.43	<0.027*
Treatment of DLP (N/%)	12 (6.4)	12 (8.5)	0/ 2.1	NS**
CIMT sin (mm)	0.54 (0.09)	0.62 (0.10)	0.08 (0.11)	<0.001*
CIMT dx (mm)	0.54 (0.09)	0.62 (0.10)	0.08 (0.12)	<0.001*
CIMT max (mm)	0.67 (0.11)	0.74 (0.11)	0.07 (0.12)	<0.001*
CIMT bilat >0.9 (N/ %)	2/ 1.1	3/ 2.1	1/ 1.0	NS**
asCIMT bilat (N/ %)	99/ 52.9	111/ 78.8	12/ 25.9	<0.001**
Carotid plaque (N/ %)	9/ 4.8	25/ 17.9	16/ 13.1	<0.001**
FIMT sin (mm)	0.56 (0.13)	0.64 (0.14)	0.08 (0.17)	<0.001*
FIMT dx (mm)	0.56 (0.14)	0.63 (0.15)	0.07 (0.15)	<0.001*
FIMT max (mm)	0.70 (0.15)	0.79 (0.17)	0.09 (0.18)	<0.001*
FIMT bilat >0.9 (N/ %)	7/ 5.1	16 (11.4)	9/ 6.3	NS**
FIMT bilat >1.1 (N/ %)	3/ 2.2	4 / 2.9	1/ 0.7	NS**
asFIMT bilat (N/ %)	32 / 23.2	63/ 44.7	31/ 21.5	<0.001**
Femoral plaque (N/ %)	5/ 3.6	25/ 17.7	20/ 14.1	<0.001**
Remarks: DLP, dyslipoproteinemia; AH, arterial hypertension; MetS, metabolic syndrome; RFs, risk factors; CIMT or FIMT: dx/sin/max, mean common carotid or femoral artery intima-media thickness: right/left/maxium value; CIMT or FIMT bilat >0.9 mm, common carotid or femoral artery intima-media thickness >0.9 mm bilaterally; FIMT bilat >1.1 mm, common femoral artery intima-media thickness >1.1 mm bi…

## Sheet: Info
Journal	#VALUE!
Article
Subclinical Atherosclerosis Progression in Low-Risk Middle-Aged Adults: Carotid Leads Femoral in IMT Increase but not in Plaque Formation
Autors
Eva Szabóová1*, Alexandra Lisovszki2, Alojz Rajnič2, Peter Kovalčik3, Peter Szabó4, Tomáš Molnár5 , Lucia Kubíková1
1 Affiliation 1: Pavol Jozef Šafárik University in Košice and East Slovak Institute of Cardiovascular Diseases,
Faculty of Medicine, Department of Angiology, Slovakia
2 Affiliation 2: Pavol Jozef Šafárik University and Louis Pasteur University Hospital in Košice, Faculty of
Medicine, 4th Department of Internal Medicine, Slovakia
3 Affiliation 3: Pavol Jozef Šafárik University in Košice, Faculty of Medicine, Department of Health
Psychology and Research Methodology, Slovakia
4 Affiliation 4: Technical University of Košice, Department of Aviation Technical Studies, Slovakia
5 Affiliation 5: Pavol Jozef Šafárik University in Košice and East Slovak Institute of Cardiovascular Diseases,
Faculty of Medicine, Department of Vascular Surgery, Slovakia
* Correspondence: eva.szaboova@upjs.sk
Article sent: July 14, 2024
