# Supplementary material for: Subclinical Atherosclerosis Progression in Low-Risk Middle-Aged Adults: Carotid Leads Femoral in IMT Increase but not in Plaque Formation
Source: Preprints.org preprint supplement (doi:10.20944/preprints202407.1343.v1), 2024-07-16
Supplement: Supplementary file 2 [file Table 1.xlsx]

## Sheet: Table 1
Parameters	Baseline	Follow-up	∆	P
	N=141 Mean (SD)	N=141 Mean (SD)	Mean (SD)
Age (yr)	45.64 (5.02)	49.64 ( 4.67)	4.35 (1.6)	<0.001
Waist circumference (cm)	87.63 (13.07)	92.33 ( 12.87)	4 (5.39)	<0.001
BMI (kg/m2)	25.28 (3.89)	25.67 (4.55)	0.38 (1.48)	0.003
Total cholesterol (mmol/L)	5.47 (0.93)	6.00 (1.09)	0.48 (0.88)	<0.001
LDL-C (mmol/L)	3.24 (0.79)	3.91 (0.83)	0.63 (0.75)	<0.001
HDL-C (mmol/L)	1.5 (0.35)	1.47 (0.36)	-0.01 (0.21)	NS
Triglycerides (mmol/L)	1.26 (0.74)	1.47 (0.856)	0.15 (0.56)	0.002
Plasma glucose (mmol/L)	5.01 (0.47)	5.13 (0.49)	0.11 (0.4)	0.001
HbA1c (IFCC) (mmol/mol)	34.4 (3.6)	32.4 (3.5)	-1.9 (3.4)	<0.001
Uric acid (µmol/L)	297.27 (80.09)	312.16 (81.9)	13.97 (45.31)	0.001
Creatinine (µmol/L)	86.45 (10.64)	71.36 (11.91)	-16.36 (5.63)	<0.001
eGFR (mL/min/1.73m2)	70.2 (7.8)	96.6 (11.4)	26.4 (9.0)	<0.001

## Sheet: Table 1 desc.
Table 1. Comparison of mean values, standard deviations (SD) and changes (∆) of continuous anthropometric, clinical and biochemical data at baseline and after follow-up assessed with paired t-test.
Parameters	Baseline	Follow-up	∆	P
	N=141 Mean (SD)	N=141 Mean (SD)	Mean (SD)
Age (yr)	45.64 (5.02)	49.64 ( 4.67)	4.35 (1.6)	<0.001
Waist circumference (cm)	87.63 (13.07)	92.33 ( 12.87)	4 (5.39)	<0.001
BMI (kg/m2)	25.28 (3.89)	25.67 (4.55)	0.38 (1.48)	0.003
Total cholesterol (mmol/L)	5.47 (0.93)	6.00 (1.09)	0.48 (0.88)	<0.001
LDL-C (mmol/L)	3.24 (0.79)	3.91 (0.83)	0.63 (0.75)	<0.001
HDL-C (mmol/L)	1.5 (0.35)	1.47 (0.36)	-0.01 (0.21)	NS
Triglycerides (mmol/L)	1.26 (0.74)	1.47 (0.856)	0.15 (0.56)	0.002
Plasma glucose (mmol/L)	5.01 (0.47)	5.13 (0.49)	0.11 (0.4)	0.001
HbA1c (IFCC) (mmol/mol)	34.4 (3.6)	32.4 (3.5)	-1.9 (3.4)	<0.001
Uric acid (µmol/L)	297.27 (80.09)	312.16 (81.9)	13.97 (45.31)	0.001
Creatinine (µmol/L)	86.45 (10.64)	71.36 (11.91)	-16.36 (5.63)	<0.001
eGFR (mL/min/1.73m2)	70.2 (7.8)	96.6 (11.4)	26.4 (9.0)	<0.001
Remarks: BMI, body mass index; LDL-C, low-density lipoprotein cholesterol; HDL-C, high-density lipoprotein cholesterol; HbA1c, glycated hemoglobin; IFCC, International Federation of Clinical Chemistry and Laboratory Medicine; eGFR, estimated glomerular filtration rate; NS, statistically nonsignificant difference; N, number; SD, standard deviation; ∆, change; p, statistical significance; yr, years.

## Sheet: Info
Journal	#VALUE!
Article
Subclinical Atherosclerosis Progression in Low-Risk Middle-Aged Adults: Carotid Leads Femoral in IMT Increase but not in Plaque Formation
Autors
Eva Szabóová1*, Alexandra Lisovszki2, Alojz Rajnič2, Peter Kovalčik3, Peter Szabó4, Tomáš Molnár5 , Lucia Kubíková1
1 Affiliation 1: Pavol Jozef Šafárik University in Košice and East Slovak Institute of Cardiovascular Diseases,
Faculty of Medicine, Department of Angiology, Slovakia
2 Affiliation 2: Pavol Jozef Šafárik University and Louis Pasteur University Hospital in Košice, Faculty of
Medicine, 4th Department of Internal Medicine, Slovakia
3 Affiliation 3: Pavol Jozef Šafárik University in Košice, Faculty of Medicine, Department of Health
Psychology and Research Methodology, Slovakia
4 Affiliation 4: Technical University of Košice, Department of Aviation Technical Studies, Slovakia
5 Affiliation 5: Pavol Jozef Šafárik University in Košice and East Slovak Institute of Cardiovascular Diseases,
Faculty of Medicine, Department of Vascular Surgery, Slovakia
* Correspondence: eva.szaboova@upjs.sk
