# Supplementary figures and images for: Subclinical Atherosclerosis Progression in Low-Risk Middle-Aged Adults: Carotid Leads Femoral in IMT Increase but not in Plaque Formation
Source: Preprints.org preprint supplement (doi:10.20944/preprints202407.1343.v1), 2024-07-16

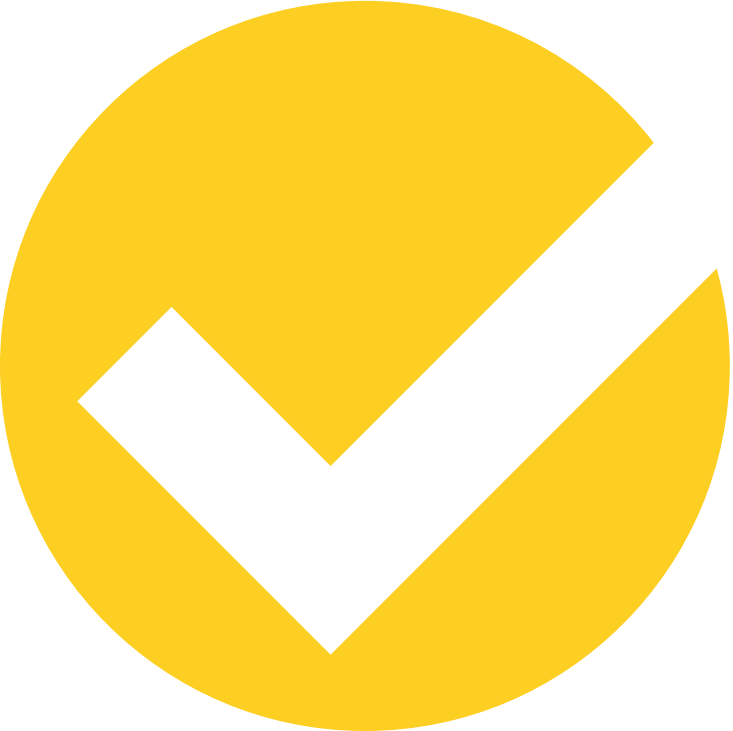

check for  
updates

Supplement: Supplementary file 2 [file supplementary]

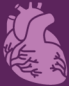

# Journal of *Cardiovascular Development and Disease*

Supplement: Supplementary file 3 [file supplementary]

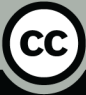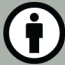

BY

Supplement: Supplementary file 5 [file supplementary]

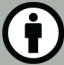

BY

Supplement: Supplementary file 6 [file supplementary]

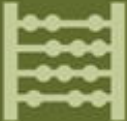

*axioms*

Supplement: Supplementary file 7 [file supplementary]
